# Supplementary material for: Hepatocyte Sirtuin 6 Protects against Atherosclerosis and Steatohepatitis by Regulating Lipid Homeostasis
Source: MDPI journal article supplement (doi:10.3390/cells12152009), 2023-08-05
Supplement: s1 [file s1]

# **Hepatocyte Sirtuin 6 protects against atherosclerosis and steatohepatitis by regulating lipid homeostasis**

Yingdong Zhu, Shuwei Hu, Xiaoli Pan, Raja Gopoju, Fathima N. Cassim Bawa, Liya  
Yin, Yanyong Xu, and Yanqiao Zhang

| <b>Table 1. qPCR primers</b> |                           |                           |
|------------------------------|---------------------------|---------------------------|
| <b>Primer name</b>           | <b>Forward (5' to 3')</b> | <b>Reverse (5' to 3')</b> |
| Acc1                         | AGTGGAGCTAGAATTGGACTTG    | ACAGTGGACAGAATTGAGGG      |
| Acc2                         | AGTCTTCCGTGCCTTTGTAC      | TTCTGCAAACATCATCCCTCG     |
| Apob                         | CGTGGGCTCCAGCATTCTA       | TCACCAGTCATTTCTGCCTTTG    |
| Ccl2                         | GTCCCTGTCATGCTTCTGG       | GCTCTCCAGCCTACTCATTG      |
| Cd36                         | TGACTGGGAAAATCAAGCTCC     | CCAGTGTATATGTAGGCTCATCC   |
| Cidea                        | GAATAGCCAGAGTCACCTTCG     | AGCAGATTCTTAACACGGC       |
| Cideb                        | TCCGTGTCTGTGATCATAAGC     | GTTAGCACTCCACGTAGCAG      |
| Col1a1                       | CATAAAGGGTCATCGTGGCT      | TTGAGTCCGTCTTTGCCAG       |
| Col3a1                       | GAAGTCTCTGAAGCTGATGGG     | TTGCCTTGCGTGTTTGATATTC    |
| Cyp7a1                       | CACCATTCCGTGCAACCTTCTGG   | ATGGCATTCCCTCCAGAGCTGA    |
| Cyp8b1                       | GTTTCTGGGTCCTCTTATTCTTG   | TGGGAGTGAAAGTGAACGAC      |
| Cyp27a1                      | GCCTCACCTATGGGATCTTCA     | TCAAAGCCTGACGCAGATG       |
| F4/80                        | ACCACAATACCTACATGCACC     | AAGCAGGCGAGGAAAAGATAG     |
| Fasn                         | GCTGCGGAAACTTCAGGAAAT     | AGAGACGTGTCACTCCTGGACTT   |
| Fsp27a                       | GCCACGCGGTATTGCCAGGA      | GGGTCTCCCGGCTGGGCTTA      |
| Fsp27b                       | GTGACCACAGCTTGGGTCGGA     | GGGTCTCCCGGCTGGGCTTA      |
| Hmgcr                        | CTTGTGGAATGCCTTGTGATTG    | AGCCGAAGCAGCACATGAT       |
| Hmgcs                        | GCCGTGAACTGGGTGCGAA       | GCATATATAGCAATGTCTCCTGCAA |
| Il1b                         | CCTGAACTCAACTGTGAAATGC    | GCGAGATTTGAAGCTGGATG      |
| Mtp                          | TCCTCTATGCCTGTGGCTTT      | TCTCTGATGTCGTTGCTTGC      |
| Plin2                        | GGATAAGCTCTATGTCTCGTGG    | GTCTGGCATGTAGTCTGGAG      |
| Plin3                        | ACCTGAGGACTTTGCAACTG      | CGTGGAAGTATAAGAGGCAG      |
| Plin4                        | AAACAGCAACAGACCCCTC       | AACTTCCCATGTCCTTGTCTC     |
| Plin5                        | CATGACTGAGGCTGAGCTAG      | GAGTGTTATAGGCGAGATGG      |
| Scd1                         | CATTCAATCCCGGGAGAATA      | CTGGCAGAGTAGTCGAAGGG      |
| Tgfb                         | CCTGAGTGGCTGTCTTTTGA      | CGTGGAGTTTGTTATCTTTGCTG   |
| Timp1                        | CTCAAAGACCTATAGTGCTGGC    | CAAAGTGACGGCTCTGGTAG      |
| Tnfa                         | CCCTCCAGAAAAGACACCATG     | GCCACAAGCAGGAATGAGAAG     |

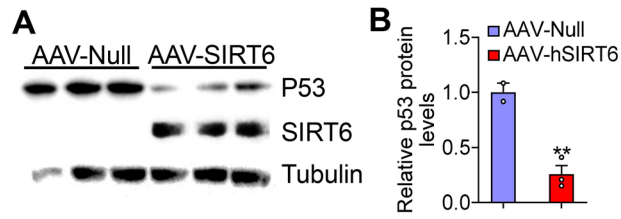

**Supplementary Figure 1. SIRT6 reduces P53 protein levels in Hepa1-6 cells**

Hepa1-6 cells were transfected with AAV8-ALB-Null or AAV8-ALB-hSIRT6 plasmid DNA. After 30 h, Western blot assays were performed (A) and P53 protein levels were quantified (B). All data are expressed as mean $\pm$ SEM. \*\* $P$ <0.01

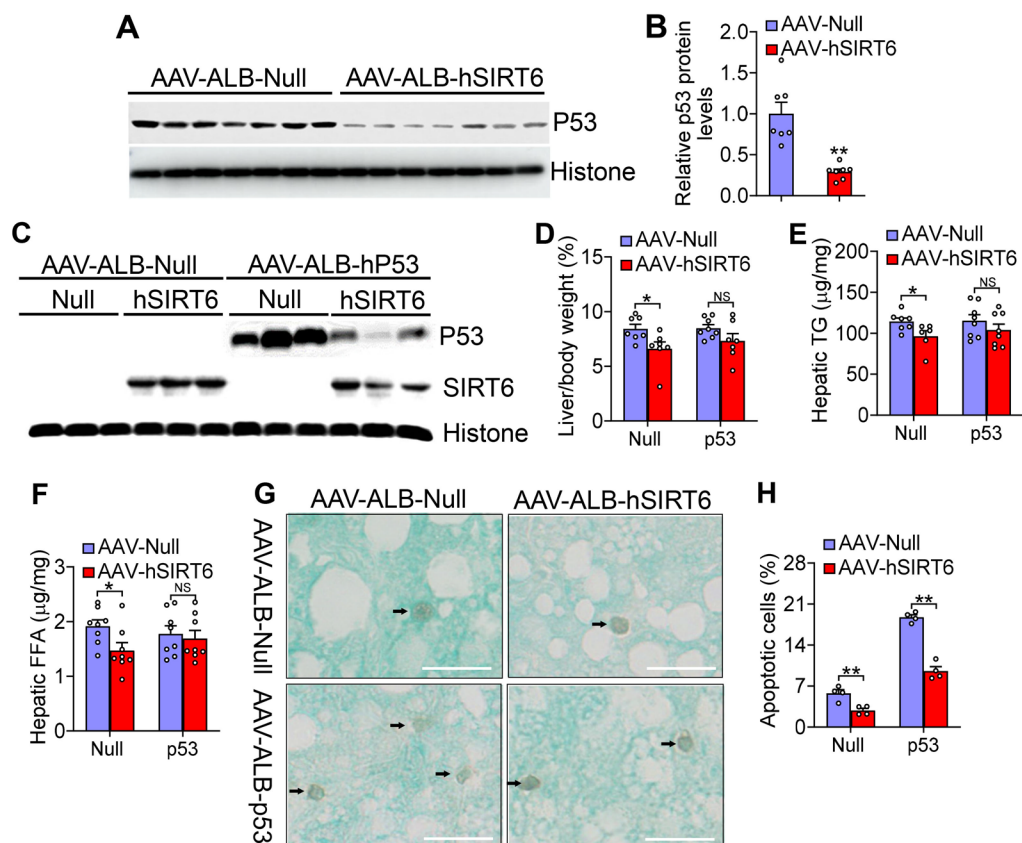

### Supplementary Figure 2. SIRT6 reduces hepatic apoptosis and lipid levels partly via P53

(A and B) Hepatic protein levels in C57BL/6 mice injected with AAV8-ALB-Null or AAV8-ALB-hSIRT6 (n=7 per group). (C-H) C57BL/6 mice were i.v. injected with AAV8-ALB-Null, AAV8-ALB-hSIRT6 and/or AAV8-ALB-hP53 (n=7-8), and then fed a Western diet for 16 weeks. Western blot assays were performed (C) and the ratio of liver to body weight (%) (D) as well as hepatic triglyceride (TG) (E) and free fatty acid (FFA) (F) levels were measured. TUNEL staining was performed (G) and apoptotic cells (%) were calculated (H). In (G), arrows point to apoptotic cells. All data are expressed as mean $\pm$ SEM. Statistical analysis was performed using a student *t*-test (B) or two-way ANOVA (D-F, H). \**P*<0.05, \*\**P*<0.01

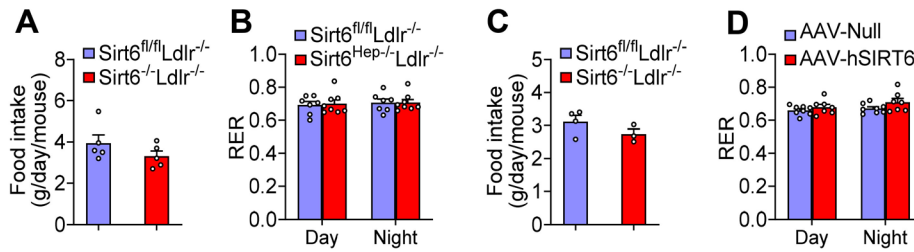

### Supplementary Figure. 3. Hepatic SIRT6 has no effect on food intake or RER in Western diet-fed Ldlr<sup>-/-</sup> mice

(A-B) Sirt6<sup>fl/fl</sup>Ldlr<sup>-/-</sup> mice and Sirt6<sup>Hep-/-</sup>Ldlr<sup>-/-</sup> mice were fed a Western diet for 16 weeks (n=8 per group). Food intake (A) and respiration exchange ratio (RER) (B) were determined. (C-D) Ldlr<sup>-/-</sup> mice were i.v. injected with AAV8-ALB-Null or AAV8-ALB-hSIRT6 and then fed a Western diet for 16 weeks (n=8 per group). Food intake (C) and RER (D) were determined. All data are expressed as mean±SEM
